# Supplementary material for: Heavy Metal Depuration Steps for Gracilaria chilensis in Outdoor Culture Systems
Source: MDPI journal article supplement (doi:10.3390/molecules27206832), 2022-10-12
Supplement: s1 [file s1]

# Heavy metal depuration steps for *Gracilaria chilensis* in outdoor culture systems

Jorge Rivas<sup>1,2,3,4</sup>, Florentina Piña<sup>1,2,3,4,5</sup>, Matías Araya<sup>1,2,3,4</sup>, Nicolás Latorre-Padilla<sup>1,2,3,4</sup>, Benjamín Pinilla-Rojas<sup>1,2,3,4</sup>, Sofía Caroca<sup>1,2,3,4</sup>, Francisca C. Bronfman<sup>6</sup> and Loretto Contreras-Porcia<sup>1,2,3,4,\*</sup>

<sup>1</sup> Departamento de Ecología y Biodiversidad, Facultad de Ciencias de la Vida, Universidad Andres Bello, Santiago 8370251, Chile

<sup>2</sup> Centro de Investigación Marina Quintay (CIMARQ), Facultad de Ciencias de la Vida, Universidad Andres Bello, Quintay, Valparaíso, 2531015, Chile

<sup>3</sup> Center of Applied Ecology and Sustainability (CAPES), Santiago 8331150, Chile

<sup>4</sup> Instituto Milenio en Socio-Ecología Costera (SECOS), Santiago 8370251, Chile

<sup>5</sup> Programa de Doctorado en Biotecnología, Facultad de Ciencias de la Vida, Universidad Andres Bello, Santiago 8370251, Chile

<sup>6</sup> Institute of Biomedical Science (ICB), Faculty of Medicine, Universidad Andres Bello, Echaurren 183, Santiago 8320000, Chile

\* Correspondence: loretocontreras@unab.cl

**Table S1.** Results of one-way ANOVA for percentage of depuration of heavy metals in *G. chilensis* biomass.

|    |                        | DF | Sum Sq  | Mean Sq | F      | P value |
|----|------------------------|----|---------|---------|--------|---------|
| As | Time (days of culture) | 2  | 56.6731 | 28.3365 | 3.229  | 0.11    |
|    | Residuals              | 6  | 52.6582 |         |        |         |
| Zn | Time (days of culture) | 2  | 2806.81 | 1403.4  | 2.61   | 0.15    |
|    | Residuals              | 6  | 3226.69 |         |        |         |
| Cu | Time (days of culture) | 2  | 447.25  | 223.625 | 3.514  | 0.09    |
|    | Residuals              | 6  | 381.823 |         |        |         |
| Cr | Time (days of culture) | 2  | 3084.94 | 1542.47 | 0.2705 | 0.77    |
|    | Residuals              | 6  | 34217.4 |         |        |         |
| Mo | Time (days of culture) | 2  | 9092.91 | 4546.46 | 4.034  | 0.07    |
|    | Residuals              | 6  | 6762.39 |         |        |         |
| Pb | Time (days of culture) | 2  | 6386.85 | 3193.42 | 0.4246 | 0.67    |
|    | Residuals              | 6  | 45120.9 |         |        |         |
| Se | Time (days of culture) | 2  | 3898.41 | 1949.2  | 0.6917 | 0.53    |
|    | Residuals              | 6  | 16908.8 |         |        |         |
| V  | Time (days of culture) | 2  | 1152.87 | 576.436 | 0.2434 | 0.79    |
|    | Residuals              | 6  | 14211.3 |         |        |         |
| Fe | Time (days of culture) | 2  | 312.167 | 156.084 | 0.3476 | 0.71    |
|    | Residuals              | 6  | 2693.83 |         |        |         |
| Cd | Time (days of culture) | 2  | 178.03  | 89.015  | 0.384  | 0.68    |
|    | Residuals              | 6  | 1390.76 |         |        |         |
| Ni | Time (days of culture) | 2  | 3651.44 | 1825.72 | 5.644  | 0.04    |
|    | Residuals              | 6  | 1940.89 |         |        |         |

**Table S2.** Physico-chemical parameters measured in the seawater during the experimental culture. T1, T2, and T3 correspond to 7, 14, and 21 days of culture after the first biomass submersion, respectively.

|    | pH   | ORP<br>(mV) | DO (ppm) | Salinity<br>(PSU) | Turbidity<br>(FNU) | T (°C) | PAR<br>( $\mu\text{mol m}^{-2} \text{s}^{-1}$ ) |
|----|------|-------------|----------|-------------------|--------------------|--------|-------------------------------------------------|
| T1 | 8.23 | 242.5       | 4.68     | 24.93             | 3.7                | 14.37  | 97                                              |
| T2 | 8.10 | 191.9       | 5.39     | 25.63             | 4.2                | 13.35  | 105                                             |
| T3 | 8.11 | 190.4       | 5.38     | 25.04             | 4.1                | 13.52  | 100                                             |

ORP: oxido-reduction potential, DO: dissolved oxygen, PAR: Photosynthetically Active Radiation.

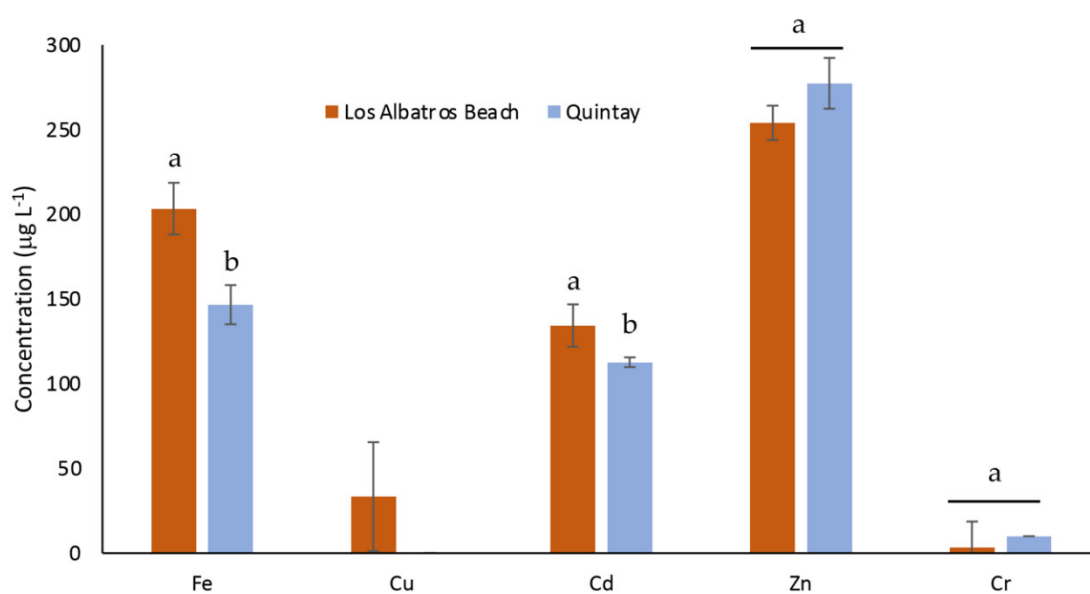

**Figure S1.** Concentration of some heavy metals studied in the seawater from Los Albatros Beach and Quintay. Bars represent mean  $\pm$  SD (n= 3). Identical letters indicate no significant difference ( $P > 0.05$ ). (Limit of detection: Fe =  $100 \mu\text{g L}^{-1}$ , Cu =  $40 \mu\text{g L}^{-1}$ , Cd =  $20 \mu\text{g L}^{-1}$ , Zn =  $50 \mu\text{g L}^{-1}$ , Cr =  $10 \mu\text{g L}^{-1}$ ).
